# Supplementary material for: Therapeutic Potential of Mesenchymal Stem Cell-Derived Extracellular Vesicles to Treat PCOS
Source: MDPI journal article supplement (doi:10.3390/ijms241311151), 2023-07-06
Supplement: s1 [file s1]

Supplementary data

a.

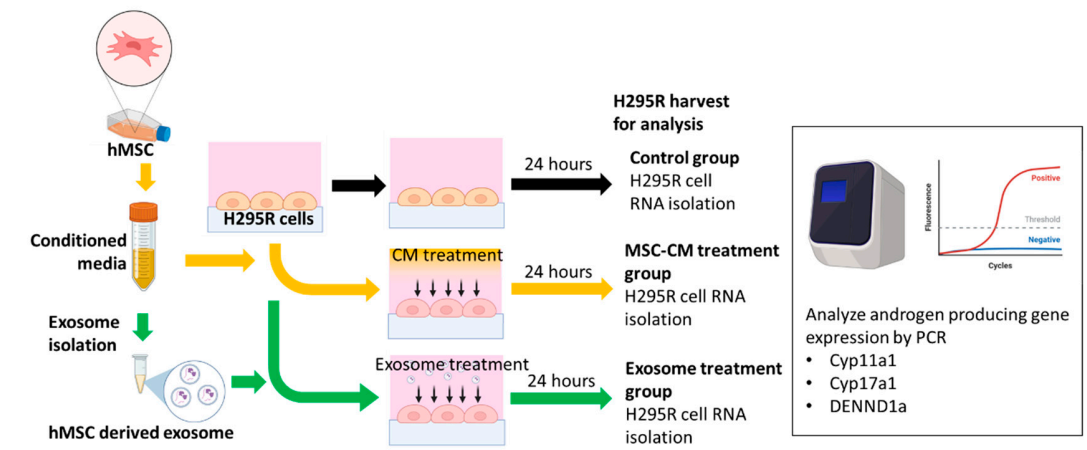

b.

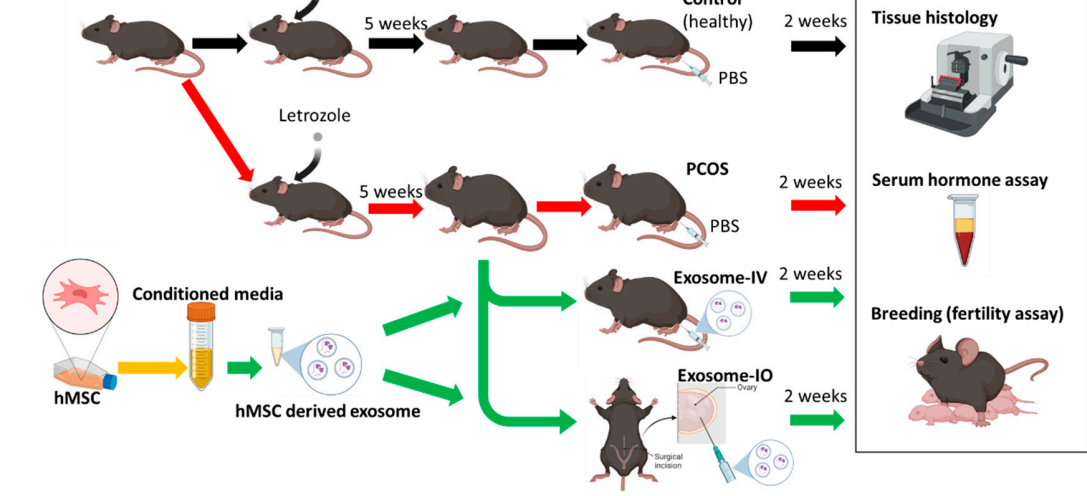

Supplementary Figure S1. Schematic image of the *in vitro* experimental plan (a) and *in vivo* experimental plan (b).
